# Supplementary material
Source: PubMed Central journal article supplement (PMC5669048)
Supplement: NIHMS891030-supplement-supplement_1.pdf [file NIHMS891030-supplement-supplement_1.pdf]

## **Relationships among obesity, Type 2 diabetes and plasma cytokines in African American women**

Gerald V. Denis<sup>1,2</sup> Paola Sebastiani<sup>3</sup>, Guillaume Andrieu<sup>1</sup>, Anna H. Tran<sup>1</sup>,

Katherine J. Strissel<sup>1</sup>, Frank L. Lombardi<sup>1</sup>, Julie R. Palmer<sup>4</sup>

1. Department of Medicine, Cancer Center, Boston University School of Medicine, Boston, MA
2. Department of Pharmacology and Experimental Therapeutics, Boston University School of Medicine, Boston, MA
3. Department of Biostatistics, Boston University School of Public Health, Boston, MA
4. Slone Epidemiology Center, Boston University, Boston, MA

### **Supporting Information: Supplementary Online Content**

#### **Histology and adipocyte area measurement**

Surgically excised breast adipose tissue was fixed, paraffin-embedded and stained with hematoxylin/eosin. Adipocyte size was measured by digital microscopy with the pathologist blinded to sample identity. A subset of the cohort was used for comparisons between T2D and ND groups to ensure number of cells counted.

#### **Immunohistochemistry and measurement of 'crown-like structure' (CLS) frequency**

Immunohistochemistry was performed on de-waxed sections of breast adipose tissue using anti-CD68 (clone KP1, Dako) and positive staining was detected using horseradish peroxidase-conjugated secondary antibody and detection kits (Vector Labs, Inc). Selected adjacent negative

control sections received isotype antibody. The number of positively stained immune / CD68+ cell foci per adipocyte section was recorded (# CLS in two sections/subject).

### **Plasma measures**

Blood was drawn by venous puncture and anticoagulated with EDTA. Plasma was prepared by centrifugation, snap-frozen, shipped if required and maintained at -80°C until assay. Aliquots for cytokine measurements were not subjected to more than two freeze thaw cycles.

### **Protein quantification**

Cytokines and chemokines were measured in plasma and conditioned medium using magnetic bead assays (EMD Millipore, human cytokine/chemokine panels I, II, III and IGF1&2) along with a miniaturization drop array plate and washer system (Curiox Biosystems, Inc), and analyzed on a Magpix instrument with Exponent software for standard curve fitting (Luminex). Median fluorescent intensity data were analyzed after a natural log transformation.

Figure S1. Cytokines significantly associated with ND vs T2D

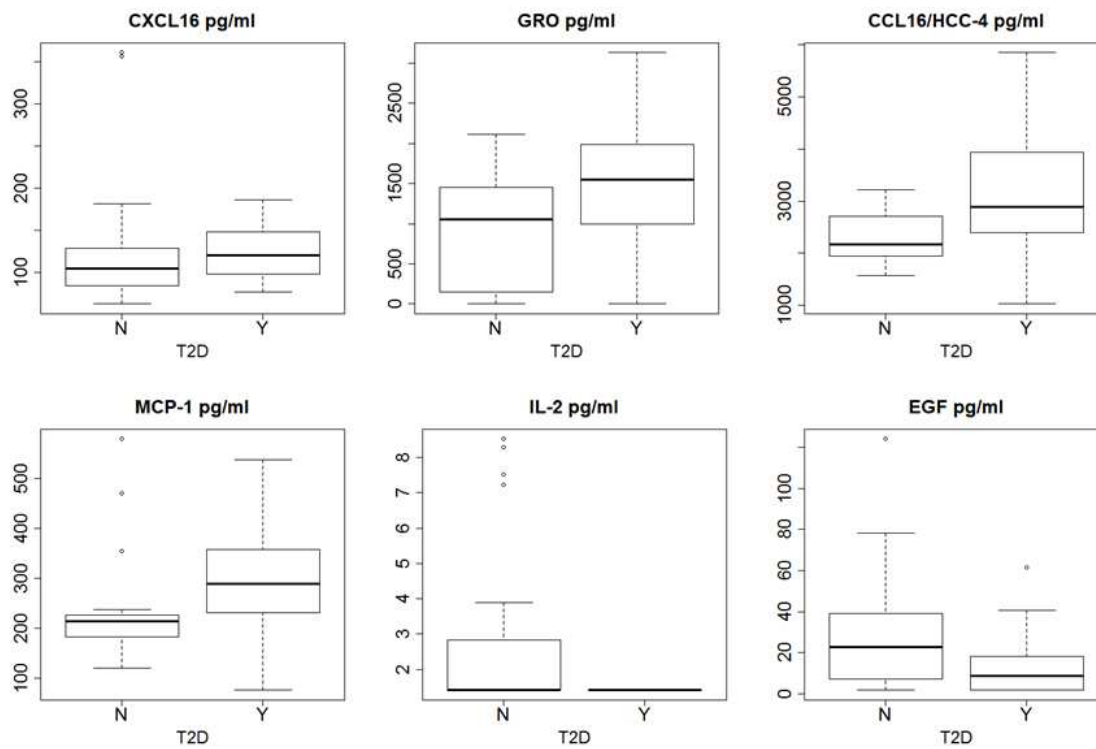

---

Cytokine concentration (pg/ml) by T2D status

Figure S2. Cytokines significantly associated with BMI, independently of T2D

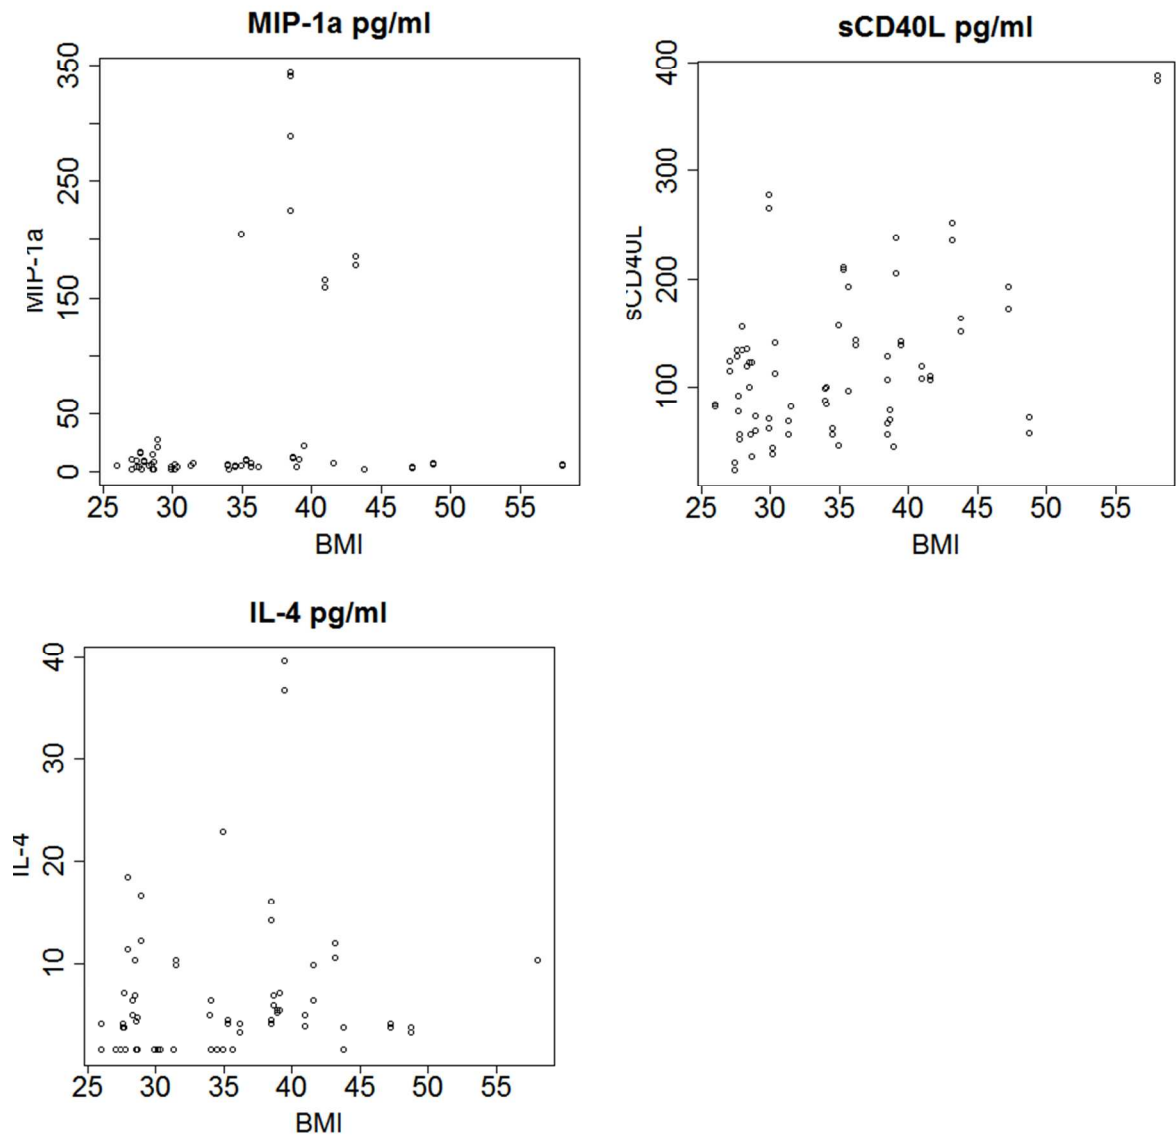

---

Cytokine concentration (pg/ml) by BMI

**Table S1. Demographic, clinical and medication information for Komen Tissue Bank subjects.**

The Komen Tissue Bank collected as much detailed medical history, including diagnoses and medications, as possible from their non-clinical, volunteer population. This information was obtained for each subject in the analysis, stripped of HIPAA identifiers and is provided in Supplementary Online Content (Table S1) with written permission from the Komen Tissue Bank. The barcode identifiers of each subject have been preserved and link to the annotated data archived in the Virtual Tissue Bank (<https://virtualtissuebank.iu.edu/>), which is accessible to the general public. Self-reported race of all subjects recruited to this study was African American; all subjects were female gender. Age was reported in years, Body Mass Index (BMI) was reported in  $\text{kg}/\text{m}^2$  and rounded to two significant figures. T2D, high blood pressure (HBP), heart disease (HeartD), immune complications, nonfasted state (food prior to donation), metformin as well as metformin combinatory drugs (Metformin), diabetes drug prescription (Diabetic), lipid medication (Lipid), hypertension medication (Hypertensive), cardiovascular disease medication (Heart.Disease), hypertension and cardiovascular disease medication (HTN.and.CVD), anti-inflammatory medication, topical anti-inflammatory medication or non-steroidal anti-inflammatory drug or steroidal medication; or other anti-inflammatory prescription, are also reported.

**Table S2. Differential expression of each plasma cytokine and chemokine in the analysis and adjustments for medications**

| <u>Cytokine</u>    | <u>log (fold change)</u> | <u>SE</u>   | <u>Model</u> | <u>p-value<sup>a</sup></u> |
|--------------------|--------------------------|-------------|--------------|----------------------------|
| α-Taxilin/IL-14    | -0.012916301             | 0.05521592  | crude        | 0.815044369                |
| APRIL/TNFSF13      | -0.038415578             | 0.18888793  | crude        | 0.838839891                |
| BAFF/BLys          | -0.027372694             | 0.073047148 | HBP          | 0.707863961                |
| BCA-1/CXCL13       | 0.107763214              | 0.111744486 | crude        | 0.334859628                |
| CCL16/HCC-4        | 0.314523382              | 0.135513075 | crude        | <b>0.020287825</b>         |
| CCL18/PARC         | 0.032725122              | 0.072484988 | crude        | 0.651647621                |
| CCL23/MPIF-1       | -0.074960677             | 0.222755341 | crude        | 0.736481989                |
| CCL28              | -0.013324271             | 0.054340174 | crude        | 0.806300716                |
| CHI3L1             | 0.242756187              | 0.222776457 | Metf-Lipid   | 0.275851881                |
| CTACK/CCL27        | 0.083651765              | 0.15705785  | crude        | 0.594298363                |
| CXCL14/BRAK        | 0.169250589              | 0.139108731 | crude        | 0.223726598                |
| CXCL16             | 0.178713333              | 0.087486975 | crude        | <b>0.041077967</b>         |
| EGF                | -0.546213116             | 0.248476434 | crude        | <b>0.027931354</b>         |
| ENA-78/CXCL5       | 0.046165804              | 0.285147972 | crude        | 0.871383644                |
| Eotaxin-1/CCL11    | 0.026256032              | 0.291863056 | Lipid-HBP    | 0.928318915                |
| Eotaxin-2/CCL24    | -0.28081047              | 0.221693482 | crude        | 0.205276558                |
| Eotaxin-3/CCL26    | -0.169373391             | 0.118996682 | crude        | 0.154636023                |
| FGF-2              | -0.159302674             | 0.114979216 | BMI-Infl     | 0.165902366                |
| FLT-3L             | 0.066082894              | 0.192633807 | crude        | 0.731561366                |
| Fractalkine/CX3CL1 | -0.185239698             | 0.134388615 | BMI          | 0.168083426                |
| G-CSF              | -0.151599613             | 0.127341677 | crude        | 0.233851944                |
| GM-CSF             | -0.075063703             | 0.126380201 | crude        | 0.552544591                |
| GRO-1/CXCL1        | 0.789525587              | 0.356001874 | HBP          | <b>0.026571417</b>         |
| HMGB1/HMG-1        | 0.047311411              | 0.043435028 | HBP          | 0.276045613                |
| I-309/CCL1         | -0.052651683             | 0.104498834 | crude        | 0.614367154                |
| IFN-α2             | -0.105807923             | 0.122109373 | crude        | 0.386215351                |
| IFN-β              | -0.021994858             | 0.051797312 | HBP          | 0.671104094                |
| IFN-γ              | -0.036662261             | 0.23877507  | HBP          | 0.877970015                |
| IFN-ω              | -0.079746242             | 0.068135702 | crude        | 0.241838761                |
| IGF-I              | 0.007465366              | 0.081726509 | crude        | 0.927217896                |
| IGF-II             | 0.030972599              | 0.028205861 | Metf-Lipid   | 0.272164805                |
| IL-10              | -0.153236049             | 0.140909869 | crude        | 0.276826664                |
| IL-12p70           | -0.215928946             | 0.128433145 | BMI          | 0.092713276                |
| IL-13              | -0.318783685             | 0.38098239  | HBP          | 0.402738022                |
| IL-15              | -0.138074088             | 0.124473561 | crude        | 0.267316145                |
| IL-16              | -0.219758312             | 0.180437846 | crude        | 0.223255533                |
| IL-17α             | -0.165689435             | 0.16121281  | BMI          | 0.304058775                |

|                                  |              |             |                |             |
|----------------------------------|--------------|-------------|----------------|-------------|
| IL-19                            | -0.059060357 | 0.06117475  | HBP-Infl       | 0.334326063 |
| IL-1 $\alpha$                    | 0.007734377  | 0.148645893 | HBP            | 0.958503017 |
| IL-1 $\beta$                     | 0.049319925  | 0.145766339 | HBP            | 0.735100048 |
| IL-1 $\alpha$                    | -0.196737236 | 0.286886234 | crude          | 0.492859778 |
| IL-2                             | -0.205316083 | 0.088465647 | Infl           | 0.020294584 |
| IL-20                            | -0.059696525 | 0.088165901 | crude          | 0.498346871 |
| IL-21                            | -0.053873547 | 0.121017747 | crude          | 0.656196446 |
| IL-23                            | -0.006337372 | 0.189266642 | HBP            | 0.97328876  |
| IL-24                            | -0.003053021 | 0.053900096 | crude          | 0.95483021  |
| IL-28A                           | -0.217008122 | 0.122209642 | crude          | 0.075781756 |
| IL-28B/IFN-L3                    | -0.014346288 | 0.056487287 | crude          | 0.799515834 |
| IL-3                             | -0.177139975 | 0.116118585 | BMI            | 0.127132129 |
| IL-32 $\alpha$                   | -0.019175743 | 0.050957596 | crude          | 0.706688051 |
| IL-33                            | 0.004093124  | 0.210469637 | HBP            | 0.984484059 |
| IL-34                            | -0.05530245  | 0.058970597 | HBP            | 0.348348735 |
| IL-35                            | -0.015964385 | 0.051791692 | HBP-Infl       | 0.757898048 |
| IL-36 $\beta$ /IL-1F8            | 0.001934517  | 0.063630713 | crude          | 0.975746252 |
| IL-37/IL-1F7                     | -0.017061849 | 0.076615259 | crude          | 0.823772752 |
| IL-38/IL-1F10                    | -0.052010576 | 0.040077861 | crude          | 0.194377265 |
| IL-4                             | -0.206792094 | 0.111134331 | BMI            | 0.062780903 |
| IL-5                             | -0.309826831 | 0.331222527 | HBP            | 0.349580208 |
| IL-6                             | 0.018762917  | 0.146744594 | crude          | 0.898258938 |
| IL-7                             | -0.006886965 | 0.114034611 | crude          | 0.951842123 |
| IL-8                             | 0.135903398  | 0.252128974 | HBP            | 0.589870761 |
| IL-9                             | -0.126993901 | 0.138032525 | HBP            | 0.357557697 |
| IL-12p40                         | -0.21988319  | 0.196082841 | crude          | 0.262126551 |
| IP-10/CXCL10                     | 0.100653125  | 0.229473024 | crude          | 0.660931639 |
| LIF                              | 0.115352054  | 0.136527027 | Metf           | 0.398165167 |
| MCP-1/CCL2                       | 0.311045757  | 0.155819145 | crude          | 0.04591245  |
| MCP-2/CCL8                       | -0.041653717 | 0.110922651 | crude          | 0.707273483 |
| MCP-4/CCL13                      | -0.118766689 | 0.151694915 | HBP            | 0.433667485 |
| MCP-3/CCL7                       | -0.373902687 | 0.479765296 | HBP            | 0.43577651  |
| MDC/CCL22                        | -0.308542586 | 0.278605945 | BMI-lipid      | 0.268098749 |
| MIP-1 $\alpha$ /CCL3             | 0.143676717  | 0.669886885 | BMI-Metf-Lipid | 0.830173486 |
| MIP-1 $\beta$ /CCL4              | -0.052068655 | 0.195790691 | crude          | 0.790285107 |
| MIP-1 $\delta$ /CCL15            | 0.134082981  | 0.162492137 | crude          | 0.409277374 |
| PDGF-AA                          | 0.18815646   | 0.159696841 | crude          | 0.238712785 |
| PDGF-AB/BB                       | -0.047498129 | 0.164435045 | crude          | 0.772691204 |
| RANTES/CCL5                      | -0.011320346 | 0.110520757 | crude          | 0.918417493 |
| sCD40L                           | 0.295183565  | 0.184103826 | crude          | 0.108856569 |
| SCF                              | -0.127767308 | 0.191320363 | crude          | 0.504249357 |
| SDF-1 $\alpha$ + $\beta$ /CXCL12 | -0.072244537 | 0.200217581 | Metf-Lipid-HBP | 0.718226435 |
| TARC/CCL17                       | 0.353751619  | 0.323201925 | Metf           | 0.273726102 |

|                     |              |             |           |             |
|---------------------|--------------|-------------|-----------|-------------|
| TGF- $\alpha$ /TFGA | -0.275997141 | 0.298707213 | BMI-HBP   | 0.355500825 |
| TNF- $\alpha$       | 0.115826485  | 0.118080753 | crude     | 0.326637567 |
| TNF- $\beta$        | -0.472057497 | 0.411403543 | HBP       | 0.251203216 |
| TPO                 | -0.047409144 | 0.117727737 | crude     | 0.68716778  |
| TRAIL               | 0.209814633  | 0.145475618 | Lipid-HBP | 0.149227163 |
| TSLP                | -0.241682885 | 0.192233017 | crude     | 0.208667032 |
| VEGF                | -0.336845324 | 0.222804346 | BMI       | 0.130573655 |
| 6CKine/CCL21        | 0.148690589  | 0.121117586 | crude     | 0.219576572 |

<sup>a</sup> In comparison of T2D/ND status, Table 2A.

Adjustment for medications is essential when human leukocyte or plasma cytokines and chemokines are assayed in the context of metabolic disease. Column 4 describes the confounders used to adjust the association between cytokine and T2D/ND status. The selection of confounders was conducted using a backward model selection to remove non-significant variables in the regression model. See the methods section for details. Crude: no adjustment needed; HBP: anti hypertensive medication; Lipid: lipid lowering medication; Infl: anti-inflammatory medication; Metf: metformin.



Table S1. Demographic, clinical and medication information for Komen Tissue Bank subjects

| Barcode | AGE | BMI     | T2D | HBP | HeartD | immune | nonfasted | Metformin        | Diabetic                                   | Lipid                        |
|---------|-----|---------|-----|-----|--------|--------|-----------|------------------|--------------------------------------------|------------------------------|
| K102484 | 62  | 39.45   | N   | N   | N      | N      | NA        | NA               | NA                                         | NA                           |
| K102495 | 62  | 27.56   | N   | Y   | N      | N      | NA        | NA               | NA                                         | NA                           |
| K102524 | 61  | 28.29   | N   | N   | Y      | N      | NA        | NA               | NA                                         | NA                           |
| K102540 | 57  | 27.98   | N   | N   | N      | N      | NA        | NA               | NA                                         | NA                           |
| K104421 | 47  | 28.53   | Y   | N   | Y      | Y      | NA        | NA               | NA                                         | NA                           |
| K104606 | 52  | 34.45   | Y   | N   | N      | N      | NA        | NA               | NA                                         | NA                           |
| K104616 | 51  | 33.94   | Y   | Y   | N      | N      | NA        | Metformin<br>HCl | NA                                         | Simvastatin                  |
| K104662 | 64  | 29.91   | Y   | Y   | N      | Y      | NA        | NA               | Glipizide ER                               | Simvastatin                  |
| K105323 | 51  | 27.73   | N   | Y   | N      | N      | Yes       | NA               | NA                                         | NA                           |
| K105326 | 47  | 27.72   | N   | N   | Y      | N      | Yes       | NA               | NA                                         | NA                           |
| K105339 | 70  | 27.37   | N   | Y   | N      | N      | Yes       | NA               | NA                                         | Atorvastatin                 |
| K105369 | 62  | 28.49   | Y   | Y   | N      | Y      | Yes       | Avandamet        | NA                                         | Rosuvastatin                 |
| K105412 | 66  | 35.6    | Y   | Y   | N      | N      | Yes       | Kombiglyze       | NA                                         | Rosuvastatin                 |
| K105464 | 60  | 38.47   | Y   | Y   | N      | N      | Yes       | NA               | NA                                         | Atorvastatin,<br>Simvastatin |
| K105494 | 63  | 37.6738 | Y   | N   | N      | N      | Yes       | Metformin<br>HCl | NA                                         | Rosuvastatin                 |
| K105500 | 69  | 36.18   | Y   | Y   | Y      | Y      | Yes       | NA               | Insulin<br>glargine,<br>Insulin<br>regular | NA                           |
| K105613 | 61  | 41.53   | Y   | Y   | N      | N      | Yes       | NA               | Insulin<br>glargine,<br>insulin<br>aspart  | Atorvastatin                 |
| K105679 | 65  | 35.3    | Y   | Y   | N      | N      | Yes       | Metformin<br>HCl | NA                                         | Ezetimibe,<br>Pravastatin    |
| K105684 | 69  | 43.12   | Y   | Y   | N      | N      | Yes       | NA               | Sitagliptin,<br>Insulin<br>glargine,       | NA                           |
| K105685 | 61  | 28.62   | Y   | N   | N      | N      | Yes       | NA               | NA                                         | NA                           |
| K105693 | 51  | 34.01   | N   | N   | N      | N      | Yes       | NA               | NA                                         | NA                           |
| K105744 | 64  | 30.18   | N   | Y   | N      | N      | Yes       | NA               | NA                                         | NA                           |

|         |    |         |   |   |   |   |     |                  |                                                           |                           |
|---------|----|---------|---|---|---|---|-----|------------------|-----------------------------------------------------------|---------------------------|
| K105758 | 44 | 39.06   | Y | Y | N | N | Yes | NA               | Sitagliptin,<br>Insulin<br>glargine                       | NA                        |
| K105911 | 70 | 27.07   | Y | N | N | N | Yes | Metformin<br>HCl | Sitagliptin                                               | Simvastatin               |
| K105947 | 67 | 48.71   | Y | Y | N | N | Yes | Metformin<br>HCl | NA                                                        | Rosuvastati<br>n          |
| K105952 | 57 | 26      | Y | Y | N | N | Yes | Metformin<br>ER  | Sitagliptin                                               | Atorvastatin              |
| K105963 | 52 | 34.95   | N | Y | N | N | No  | NA               | NA                                                        | Simvastatin,<br>Ezetimibe |
| K106195 | 51 | 40.92   | Y | Y | N | N | Yes | NA               | NA                                                        | NA                        |
| K106231 | 71 | 30.36   | Y | Y | N | N | Yes | NA               | Glimepiride                                               | Simvastatin               |
| K106240 | 53 | 38.46   | Y | Y | Y | N | Yes | NA               | Human<br>Insulin 70/30                                    | Atorvastatin              |
| K106265 | 51 | 28.95   | N | Y | Y | N | Yes | NA               | NA                                                        | NA                        |
| K106362 | 61 | 38.67   | Y | Y | Y | N | NA  | NA               | NA                                                        | NA                        |
| K106512 | 53 | 43.74   | Y | Y | N | N | Yes | Metformin        | Insulin<br>glargine,<br>Insulin<br>lispro,<br>sitagliptin | NA                        |
| K106513 | 49 | 57.9975 | Y | Y | N | N | Yes | Metformin        | Insulin<br>glargine,<br>glimepiride,<br>insulin<br>aspart | NA                        |
| K106731 | 57 | 31.44   | Y | N | N | N | Yes | NA               | Insulin<br>glargine,<br>humalog<br>kwikpen                | Rosuvastati<br>n          |
| K106802 | 50 | 31.32   | Y | Y | N | N | Yes | NA               | Sitagliptin                                               | NA                        |
| K106809 | 68 | 29.85   | Y | Y | N | N | Yes | Metformin        | Acarbose                                                  | Atorvastatin              |
| K107223 | 54 | 38.94   | Y | N | Y | Y | No  | Metformin<br>HCl | NA                                                        | Atorvastatin              |
| K107430 | 54 | 47.25   | Y | Y | N | N | Yes | NA               | Insulin lispro                                            | NA                        |

| Hypertensive                                                    | Heart.Disease | HTN+CVD           | Topical.Anti.infla    |                      |                                      |
|-----------------------------------------------------------------|---------------|-------------------|-----------------------|----------------------|--------------------------------------|
|                                                                 |               |                   | Anti.inflammat<br>ory | mm.NSAID.steroi<br>d | Other.Anti.inflamm.NSAID.ste<br>roid |
| NA                                                              | NA            | NA                | NA                    | NA                   | NA                                   |
| Metoprolol-XL,<br>valsartan                                     | Metoprolol-XL | Metoprolol-<br>XL | NA                    | NA                   | NA                                   |
| NA                                                              | NA            | NA                | Ibuprofen             | NA                   | NA                                   |
| NA                                                              | NA            | NA                | NA                    | NA                   | NA                                   |
| NA                                                              | NA            | NA                | NA                    | NA                   | NA                                   |
| NA                                                              | NA            | NA                | NA                    | NA                   | NA                                   |
| Amlodipine,<br>Hydrochlorothi<br>azide                          | NA            | NA                | NA                    | NA                   | NA                                   |
| Lisinopril,<br>Triamterene,<br>Hydrochlorothi<br>azide, Timolol | NA            | NA                | NA                    | NA                   | NA                                   |
| Metoprolol-XL,<br>valsartan,<br>Hydrochlorothi<br>azide         | Metoprolol-XL | Metoprolol-<br>XL | NA                    | NA                   | NA                                   |
| NA                                                              | NA            | NA                | Meloxicam             | NA                   | NA                                   |
| NA                                                              | NA            | NA                | Aspirin               | NA                   | NA                                   |
| Lisinopril,<br>Hydrochlorothi<br>azide                          | NA            | NA                | NA                    | NA                   | NA                                   |
| Amlodipine,<br>Carvedilol,<br>Losartan                          | Carvedilol    | Carvedilol        | NA                    | NA                   | NA                                   |
| Benazepril,<br>Amlodipine                                       | NA            | NA                | NA                    | NA                   | NA                                   |
| Losartan                                                        | NA            | NA                | NA                    | NA                   | NA                                   |
| Benazepril,<br>Amlodipine,<br>Clonidine HCl                     | Furosemide    | NA                | NA                    | NA                   | NA                                   |
| Lisinopril,<br>Hydrochlorothi<br>azide                          | NA            | NA                | Aspirin               | NA                   | NA                                   |
| Valsartan                                                       | NA            | NA                | Meloxicam             | NA                   | NA                                   |
| Metoprolol-XL,<br>Amlodipine,<br>Quinapril                      | NA            | NA                | NA                    | NA                   | NA                                   |
| NA                                                              | NA            | NA                | Budesonide            | NA                   | NA                                   |
| NA                                                              | NA            | NA                | NA                    | NA                   | NA                                   |
| Hydrochlorothi<br>azide                                         | NA            | NA                | Naproxen              | NA                   | NA                                   |

|                                                                                     |                                                      |                                          |                         |                |                         |
|-------------------------------------------------------------------------------------|------------------------------------------------------|------------------------------------------|-------------------------|----------------|-------------------------|
| Metoprolol Tartrate,<br>Clonidine HCl,<br>Nifedical XL,<br>Hydralazine              | Furosemide,<br>Metoprolol tartrate                   | Metoprolol Tartrate                      | NA                      | NA             | NA                      |
| NA                                                                                  | NA                                                   | NA                                       | NA                      | NA             | NA                      |
| Triamterene,<br>Hydrochlorothi<br>azide                                             | NA                                                   | NA                                       | Aspirin,<br>Meloxicam   | NA             | NA                      |
| Lisinopril                                                                          | NA                                                   | NA                                       | NA                      | NA             | NA                      |
| Atenolol,<br>Triamterene,<br>Hydrochlorothi<br>azide                                | NA                                                   | NA                                       | NA                      | NA             | NA                      |
| NA                                                                                  | NA                                                   | NA                                       | NA                      | NA             | NA                      |
| Losartan                                                                            | NA                                                   | NA                                       | Aspirin                 | NA             | NA                      |
| Lisinopril,<br>Carvedilol,<br>Diltiazem SR,<br>Isosorbide mononitrate               | Furosemide,<br>Carvedilol,<br>Isosorbide mononitrate | Carvedilol,<br>Isosorbide mononitrate    | Aspirin<br>Montelukast  | NA<br>NA<br>NA | Fluticasone<br>NA<br>NA |
| NA                                                                                  | NA                                                   | NA                                       | NA                      | NA             | NA                      |
| NA                                                                                  | NA                                                   | NA                                       | NA                      | NA             | NA                      |
| Ramipril                                                                            | Ramipril                                             | Ramipril                                 | NA                      | NA             | NA                      |
| Lisinopril                                                                          | Furosemide                                           | NA                                       | NA                      | NA             | NA                      |
| Losartan                                                                            | NA                                                   | NA                                       | Etodolac                | NA             | NA                      |
| Carvedilol,<br>Lisinopril,<br>Hydrochlorothi<br>azide                               | Carvedilol                                           | Carvedilol                               | NA                      | NA             | NA                      |
| Lisinopril                                                                          | NA                                                   | NA                                       | NA                      | NA             | NA                      |
| Metoprolol-XL,<br>Lisinopril,<br>Hydrochlorothi<br>azide,<br>Isosorbide mononitrate | Metoprolol-XL,<br>Isosorbide mononitrate             | Metoprolol-XL,<br>Isosorbide mononitrate | Montelukast,<br>Aspirin | NA             | NA                      |
| Amlodipine,<br>valsartan                                                            | NA                                                   | NA                                       | NA                      | NA             | NA                      |
